# Supplementary material for: DNA damage triggers tubular endoplasmic reticulum extension to promote apoptosis by facilitating ER-mitochondria signaling
Source: PubMed Central journal article supplement (PMC6063967; doi:10.1038/s41422-018-0065-z), 2018-07-20
Supplement: 41422_2018_65_MOESM3_ESM.pdf [file 41422_2018_65_MOESM3_ESM.pdf]

**Videos S1 and S2. DNA Damage Triggers Tubular ER Extension, Related to Figure 1.** Representative time-lapse video recording of COS7 cells transfected with mCherry-ER and treated with 50  $\mu$ M eto. The indicated times are shown as hour: minute. Scale bar, 10  $\mu$ m.
