# Supplementary material for: DNA damage triggers tubular endoplasmic reticulum extension to promote apoptosis by facilitating ER-mitochondria signaling
Source: PubMed Central journal article supplement (PMC6063967; doi:10.1038/s41422-018-0065-z), 2018-07-20
Supplement: 41422_2018_65_MOESM4_ESM.pdf [file 41422_2018_65_MOESM4_ESM.pdf]

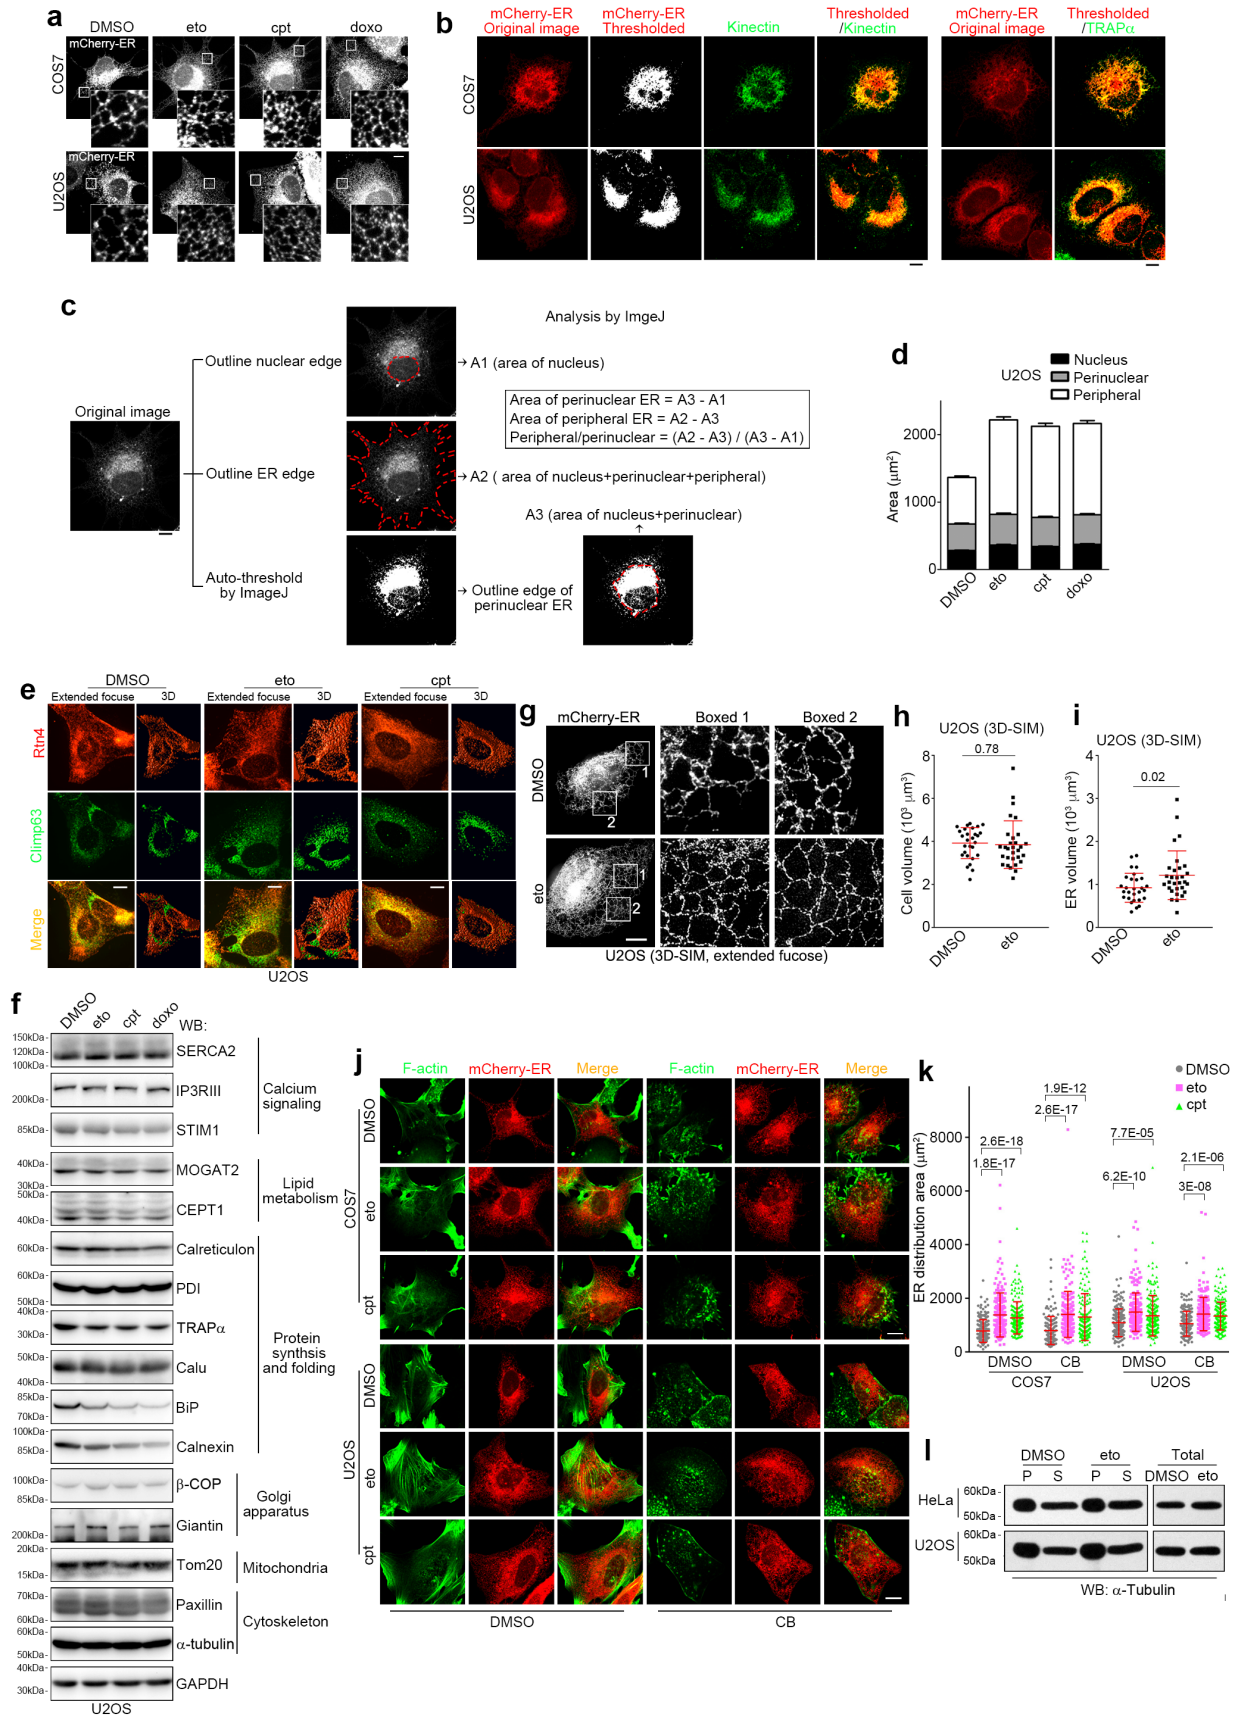

**Figure S1. DNA Damage Triggers Tubular ER Extension and Methodology for ER Morphology Analysis.**

(a) Representative images of the ER in COS7 and U2OS cells treated with DMSO, 50  $\mu$ M eto, 1  $\mu$ M cpt, or 1  $\mu$ M doxo for 16 hours. Scale bar, 10  $\mu$ m. The outlined area is magnified at the lower right of each panel.

(b) Representative images of U2OS and COS7 cells transfected with mCherry-ER, and immuno-stained with anti-Kinectin or anti-TRAP $\alpha$  antibodies. Scale bars, 10  $\mu$ m.

(c) Schematic figure illustrating the analysis of the distribution area for ER structures.

(d) Areas of different ER structures in U2OS cells treated with DMSO, 50  $\mu$ M eto, 1  $\mu$ M cpt or 1  $\mu$ M doxo for 16 hours.  $n \geq 120$  cells.

(e) Representative images of extended focus (left panel) or 3D reconstruction (right panel) results of fluorescently co-immunolabeled Rtn4 (red) and Climp63 (green) in U2OS cells treated with DMSO, 50  $\mu$ M eto or 1  $\mu$ M cpt for 16 hours. Data are captured by spinning disc microscopy and deconvolved by Volocity. Scale bars, 10  $\mu$ m.

(f) Western blot analysis of lysates from U2OS cells treated with DMSO, 50  $\mu$ M eto, 1  $\mu$ M cpt or 1  $\mu$ M doxo for 16 hours. GAPDH served as a loading control. SERCA2, sarco/endoplasmic reticulum  $\text{Ca}^{2+}$ -ATPase; IP3RIII, inositol 1,4,5-trisphosphate (IP3) receptor III; STIM1, stromal interaction molecule 1; MOGAT2, monoacylglycerol *O*-acyltransferase 2; CEPT1, choline/ethanolamine phosphotransferase 1; PDI, protein disulfide isomerase; TRAP $\alpha$ , translocon-associated protein  $\alpha$ ; BiP, Ig binding protein.

(g) Representative 3D-SIM images of mCherry-ER in U2OS cells treated with DMSO or 50  $\mu$ M eto for 16 hours. Images are shown in the extended focus manner. Boxed regions are magnified. Scale bar, 10  $\mu$ m.

(h, i) Statistical analyses of the volumes of total cell (h) and ER (i) from 3D-SIM images of GFP and mCherry-ER in U2OS cells treated with DMSO or 50  $\mu$ M eto for 16 hours.  $n \geq 27$  cells.

(j) COS7 (upper panel) or U2OS (lower panels) cells transfected with mCherry-ER were treated with DMSO, 50  $\mu$ M eto or 1  $\mu$ M cpt in the absence or presence of 5  $\mu$ M cytochalasin B (CB) for 16 hours, and labeled with phalloidin (green) to show actin filaments (F-actin). Scale bar, 10  $\mu$ m.

(k) Corresponding analyses of the ER distribution area shown in (j).

(l) Assays to determine the status of microtubule polymerization in HeLa and U2OS cells treated with 50  $\mu$ M eto for 16 hours. After centrifugation, pellet (P) and supernatant (S) fractions were subjected to western blot (WB) analysis.
