# Supplementary material for: DNA damage triggers tubular endoplasmic reticulum extension to promote apoptosis by facilitating ER-mitochondria signaling
Source: PubMed Central journal article supplement (PMC6063967; doi:10.1038/s41422-018-0065-z), 2018-07-20
Supplement: 41422_2018_65_MOESM6_ESM.pdf [file 41422_2018_65_MOESM6_ESM.pdf]

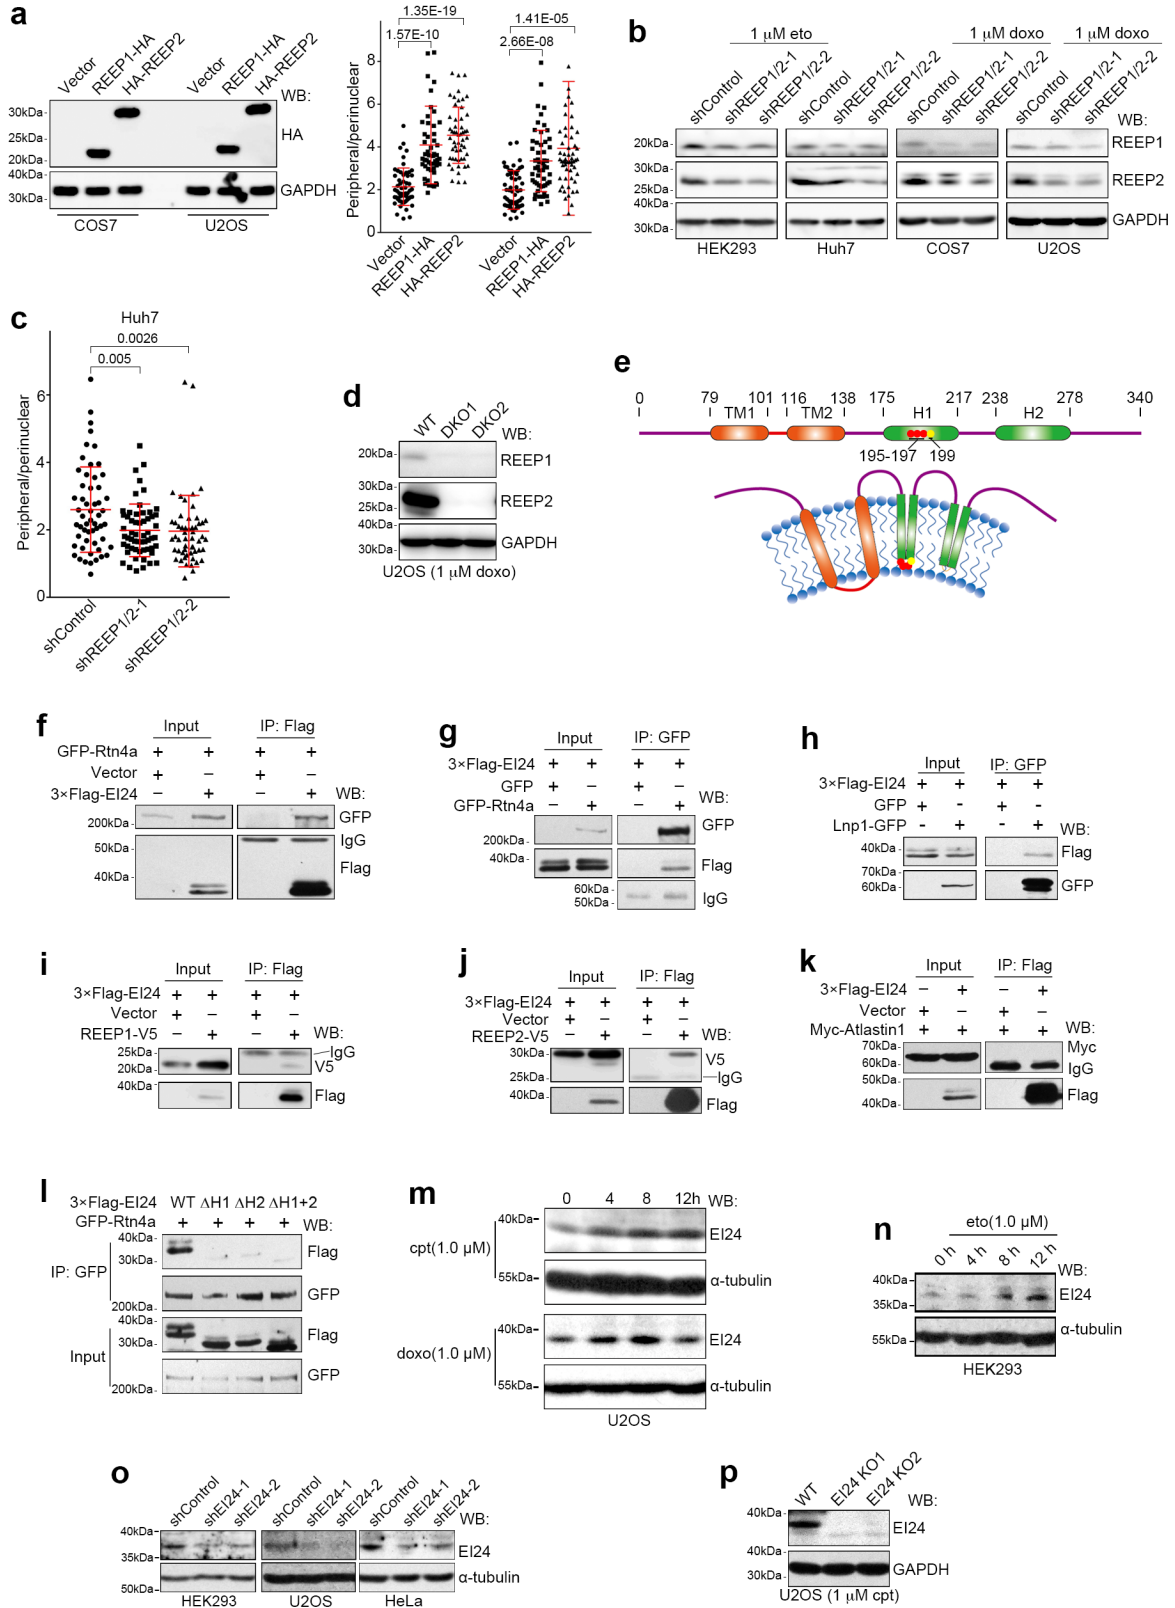

**Figure S3. Depletion of REEP1/2 or EI24, and Association of EI24 with other ER-shaping Proteins.**

(a) Distribution ratios (right panel) of peripheral/perinuclear ER in COS7 and U2OS cells overexpressing control (vector), REEP1-HA or HA-REEP2.  $n \geq 50$  cells. Corresponding western blot (WB) analysis is shown in the left panel.

(b) Lysates from HEK293, Huh7, COS7, and U2OS cells transfected with control (shControl) or REEP1/2 shRNAs (shREEP1/2) were subjected to western blot analysis. HEK293 cells were treated with 1  $\mu$ M eto for 16 hours. COS7 and U2OS cells were treated with 1  $\mu$ M doxo for 16 hours. shREEP1/2 indicates co-transfection of shREEP1 and shREEP2.

(c) Distribution ratio of peripheral/perinuclear ER in Huh7 cells transfected with control (shControl) or REEP1/2 shRNAs (shREEP1/2). shREEP1/2 indicates co-transfection of shREEP1 and shREEP2.  $n \geq 50$  cells.

(d) Western blot analysis of lysates from wild-type (WT) and REEP1/2 double-knockout (DKO) U2OS cells.

(e) Schematic of EI24 domains. Cytosolic sequences of EI24 are marked as purple lines, while luminal EI24 is marked as a red line. Two pathological point mutation sites in the first hairpin region are indicated as red or yellow dots. TM: regular transmembrane domain; H: intramembrane hairpin region.

(f-k) HEK293T cells co-overexpressing 3 $\times$ Flag-EI24 together with GFP-Rtn4a (f and g), Lnp1-GFP (h), REEP1-V5 (i), REEP2-V5 (j), or myc-Atlastin1 (k) were subjected to immunoprecipitation (IP) and western blot as shown.

(l) HEK293T cells transfected with GFP-Rtn4a and wild-type or truncated 3 $\times$ Flag-EI24 constructs were subjected to an immunoprecipitation assay and western blot at 36-hours post-transfection.

(m, n) Western blot analysis of lysates from U2OS cells treated with 1  $\mu$ M cpt or 1  $\mu$ M doxo (m) or else HEK293 cells treated with 1  $\mu$ M eto (n) for the indicated times. Tubulin served as a loading control.

(o) Western blot analysis of lysates from HEK293, U2OS or HeLa cells transfected with control (shControl) or EI24 shRNA (shEI24) for 60 hours. Tubulin served as a loading control.

(p) Western blot analysis of lysates from wild-type and EI24 knockout (KO) U2OS cells treated with 1  $\mu$ M cpt for 16 hours.
