# Supplementary material for: DNA damage triggers tubular endoplasmic reticulum extension to promote apoptosis by facilitating ER-mitochondria signaling
Source: PubMed Central journal article supplement (PMC6063967; doi:10.1038/s41422-018-0065-z), 2018-07-20
Supplement: 41422_2018_65_MOESM10_ESM.pdf [file 41422_2018_65_MOESM10_ESM.pdf]

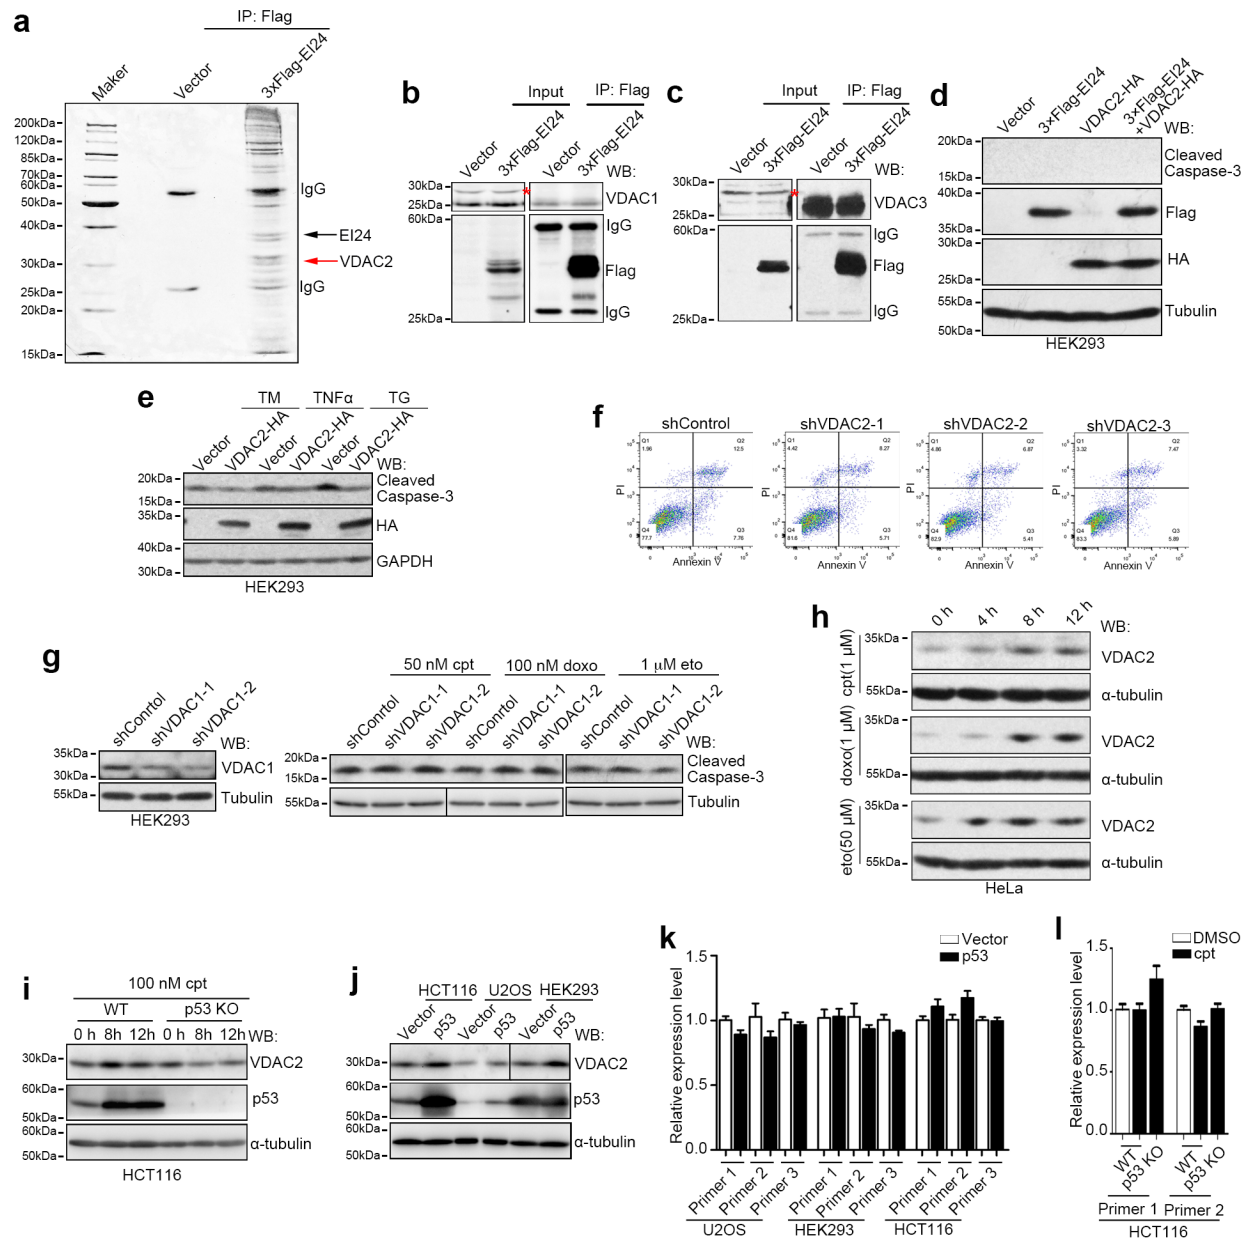

**Figure S7. EI24 Specifically Interacts with VDAC2 and VDAC2 Protein Level is Increased Upon DNA Damage in a p53-dependent Manner.**

(a) HEK293T cells transfected with the vector or 3xFlag-EI24 were immunoprecipitated (IP) with anti-Flag antibodies 36 hours after transfection, and the precipitated samples were analyzed by silver staining and mass spectrometry analysis. The black arrow indicates 3xFlag-EI24 enrichment, and the red arrow indicates VDAC2.

(b, c) HEK293T cells transfected with either the vector or 3xFlag-EI24 were immunoprecipitated with anti-Flag antibodies and subjected to western blot analysis with anti-Flag and either anti-VDAC1 (b) or anti-VDAC3 (c) antibodies.

(d) Western blot analysis of lysates from HEK293 cells transfected with 3xFlag-EI24 and VDAC2-HA, as

indicated.

- (e) Western blot analysis of lysates from HEK293 cells transfected with either the control vector or VDAC2-HA and treated with 1  $\mu$ M TM, 50 ng/mL TNF $\alpha$  or 100 nM TG for 12 hours.
- (f) Representative flow cytometry analyses for VDAC2 shRNA-transfected cells positive for propidium iodide (PI) or Annexin V. Cells were treated with 100 nM cpt 12 hours.
- (g) Western blot analysis of lysates from HEK293 cells transfected with control or VDAC1 shRNA and treated with 50 nM cpt, 100 nM doxo or 1  $\mu$ M eto for 12 hours.
- (h) Western blot analysis of lysates from HeLa cells treated with cpt, doxo or eto for the indicated times.
- (i) Western blot (WB) analysis of lysates from wild-type (WT) or p53-knockout (KO) HCT116 cells treated with 100 nM cpt for the indicated times. Tubulin served as a loading control.
- (j) Western blot analysis of lysates from HCT116, U2OS and HEK293 cells transfected with the vector or p53.
- (k) U2OS, HEK293 and HCT116 cells were transfected with the control vector or p53 for 24 hours, and relative VDAC2 mRNA levels were analyzed by quantitative real-time PCR (n = 8).
- (l) Wild-type (WT) or p53-knockout HCT116 cells were treated with DMSO or cpt for 12 hours, and the relative VDAC2 mRNA levels were analyzed by quantitative real-time PCR (n = 8).
