# Supplementary material for: DNA damage triggers tubular endoplasmic reticulum extension to promote apoptosis by facilitating ER-mitochondria signaling
Source: PubMed Central journal article supplement (PMC6063967; doi:10.1038/s41422-018-0065-z), 2018-07-20
Supplement: 41422_2018_65_MOESM11_ESM.pdf [file 41422_2018_65_MOESM11_ESM.pdf]

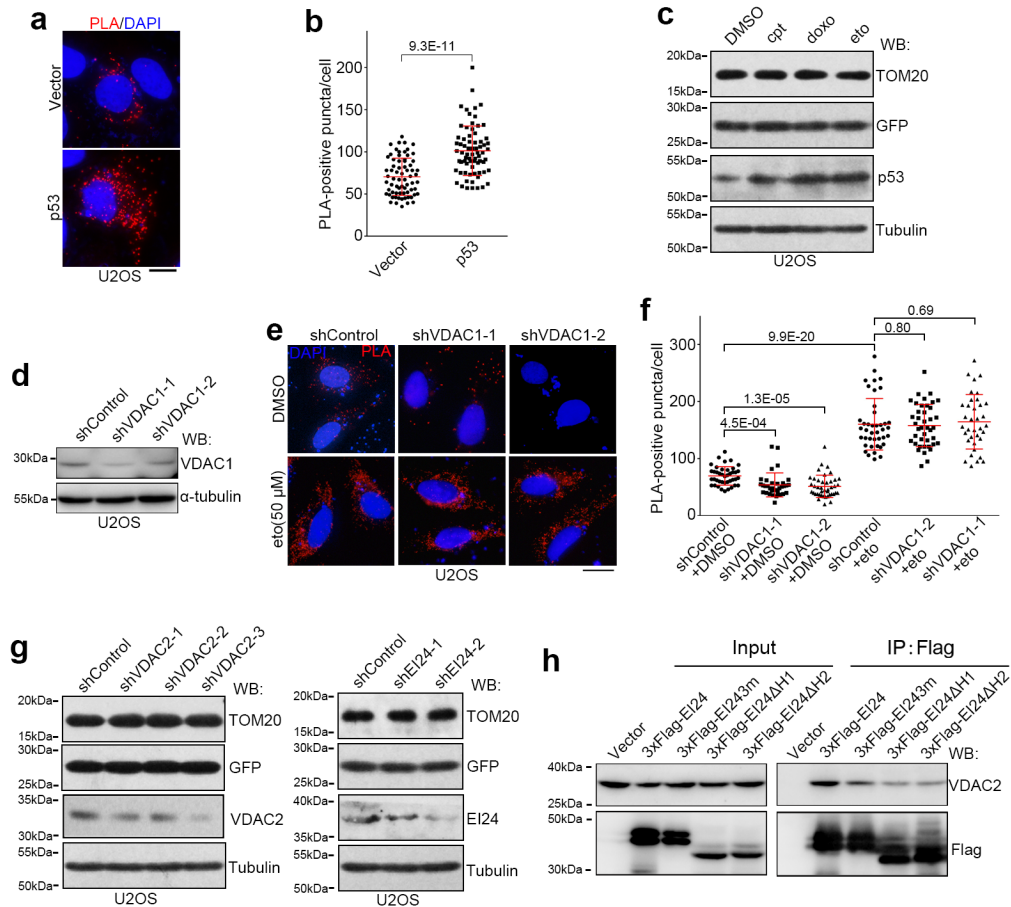

**Figure S8. Control Data for DNA Damage Promotes ER-mitochondria Contacts by EI24 and VDAC2**

(a) Representative images of the PLA (red) results for U2OS cells transfected with vector or p53. DNA was stained with DAPI (blue). Scale bar, 10  $\mu$ m.

(b) Statistical analysis of the number of PLA-positive puncta per cell in (a).

(c) Western blot (WB) analysis of lysates from U2OS cells treated with DMSO, 1  $\mu$ M cpt, 1  $\mu$ M doxo or 50  $\mu$ M eto for 12 hours.

(d) Western blot analysis of lysates from U2OS cells transfected with control (shControl) or VDAC1 shRNA (shVDAC1) for 60 hours.

(e) U2OS cells stably expressing CFP-ER were transfected with control (shControl) or VDAC1 shRNA (shVDAC1), treated with DMSO or eto, probed with anti-TOM20 and anti-GFP antibodies, and subjected to PLA. Scale bar, 10  $\mu$ m.

(f) Quantification of the number of PLA-positive puncta/cell in (e).

(g) Western blot analysis of lysates from U2OS cells transfected with the indicated shRNAs.

(h) HEK293T cells transfected with the control vector, 3 $\times$ Flag-EI24, 3 $\times$ Flag-EI243m, 3 $\times$ Flag-EI24 $\Delta$ H1 or 3 $\times$ Flag-EI24 $\Delta$ H2 were subjected to immunoprecipitation (IP) assays and western blot analysis with the indicated antibodies.
