# Supplementary material for: DNA damage triggers tubular endoplasmic reticulum extension to promote apoptosis by facilitating ER-mitochondria signaling
Source: PubMed Central journal article supplement (PMC6063967; doi:10.1038/s41422-018-0065-z), 2018-07-20
Supplement: 41422_2018_65_MOESM14_ESM.pdf [file 41422_2018_65_MOESM14_ESM.pdf]

Table S1. Primers Used for qRT-PCR

|                |                            |
|----------------|----------------------------|
| F-RT-Atlastin1 | CCAAATGACTTGCAGACCAAAC     |
| R-RT-Atlastin1 | CCCTCGGAATAGCTTCACAGA      |
| F-RT-Atlastin2 | CGTACCCCAGCCACACTGT        |
| R-RT-Atlastin2 | TGAAGCCAGTCAGTCCTGAGATT    |
| F-RT-Atlastin3 | CCGATGTCACCTGCTTTCTCTT     |
| R-RT-Atlastin3 | CCATCAAAGTCAGGGCTTGTG      |
| F-RT-Climp63   | TGGAGGCGGACTTGAAAATG       |
| R-RT-Climp63   | ATTTTGACCGAGTATGCAACCA     |
| F-RT-Kinectin  | GGAGCAGAATGAGGCTTTGAA      |
| R-RT-Kinectin  | CGGAGGTCTGGGCTGCTA         |
| F-RT-Lnp1      | GCCCTATCATCAAATGTGTTACCA   |
| R-RT-Lnp1      | CCCATTCCAGGCACTGAAGT       |
| F-RT-p180      | CCAGAGGCACCAAAGCAAGA       |
| R-RT-p180      | GGGCCCAGGCTCACCTT          |
| F-RT-Protrudin | GATGAACCCAAAGCAGGAAGAG     |
| R-RT-Protrudin | ATCCTTCCCCCAACATCTG        |
| F-RT-Rab3GAP1  | GGGAAACTTACACTGCTGCATAATG  |
| R-RT-Rab3GAP1  | AGGTGCTGGTTCCTGGGTTA       |
| F-RT-Rab3GAP2  | CAAGCCAAAAGAGGAGTTCCA      |
| R-RT-Rab3GAP2  | AAGTAAAACCCACCACAATGCA     |
| F-RT-Rab10     | AGGCCAGGAGCGATTTCAC        |
| R-RT-Rab10     | ACCCATTGCGCCTCTGTAGT       |
| F-RT-Rab18     | TCCTCATCATCGGCGAGAGT       |
| R-RT-Rab18     | AACGTATCATCTGTGAACCTCAAGAG |
| F-RT-REEP1     | GGGACAGGGTGCCTTATCG        |
| R-RT-REEP1     | TGGTGAGGTCCTGCATGCT        |
| F-RT-REEP2     | TGGCTGCTGTCCCCTTACA        |

|              |                                |
|--------------|--------------------------------|
| R-RT-REEP2   | GTGCACGAACTGCGGTAGA            |
| F-RT-REEP3   | GTTGCTTGGTTTCCCCTGTACT         |
| R-RT-REEP3   | GGAGAAAGCAGCCATATGACAAA        |
| F-RT-REEP4   | CCTGCTTTACCGCAAGTTTGT          |
| R-RT-REEP4   | CGCGTCGATCTCCTTCTCAT           |
| F-RT-REEP5   | CACGAGTCCCAGATGGACAGT          |
| R-RT-REEP5   | CTGCAGTCTCTTTGGCCTTGT          |
| F-RT-REEP6   | AAGTGCGCCTTCCTGTTGTT           |
| R-RT-REEP6   | CATGAGAGCCCCGTTCCA             |
| F-RT-Rtn1    | GGCCTACTTGGAGCTTGAGATC         |
| R-RT-Rtn1    | GCAGGCAGTCCGTGTACTTCT          |
| F-RT-Rtn2    | GGTCTTCGCCCCACTGCAA            |
| R-RT-Rtn2    | CCTTCTGTGGAATCAGGAGTTGA        |
| F-RT-Rtn3    | GACTCCTTGAAGCTGGCTGTCT         |
| R-RT-Rtn3    | TCCGTTAAAAACAGCACCAACA         |
| F-RT-Rtn4    | ACACTACTGATTTTGGCTCTCATTTC     |
| R-RT-Rtn4    | TGTGCCTGATGCCGTTTCAT           |
| F-RT-Spastin | CCACCTGGGAATGGGAAGA            |
| R-RT-Spastin | TTGCATTTCGATTCTGCAGCTA         |
| F-RT-STIM1   | TGGGATCTCAGAGGGATTGA           |
| R-RT-STIM1   | GCTGGCGGTCACTCATGTG            |
| F-RT-EI24    | GAATGCCATTTGGTTTCAGGAT         |
| R-RT-EI24    | TGAGGCTTCCTCCCTGATACC          |
| F-RT-VDAC2-1 | CCTTGGTTGTGATGTTGACTTTGA       |
| R-RT-VDAC2-1 | CTGATGTCCAAGCAAGGTTTACTG       |
| F-RT-VDAC2-2 | TTGGATCCCCTGCTTCCATTTCTGCAA    |
| R-RT-VDAC2-2 | ATTAATGCTCTTCCCATCTACCAGAGCAGA |
| F-RT-VDAC2-3 | CTGGGAACAGAAATCGCAA            |

|              |                      |
|--------------|----------------------|
| R-RT-VDAC2-3 | TGAACCATGGATTGCAGGT  |
| F-RT-GAPDH   | GGCATCCTGGGCTACACTGA |
| R-RT-GAPDH   | GGAGTGGGTGTCGCTGTTG  |
